# Supplementary material for: Identification of novel genes associated with longevity in Drosophila melanogaster - a computational approach
Source: publisher site journal article supplement (doi:10.18632/aging.102527), 2019-12-03
Supplement: Supplementary file [file aging-v11i23-102527-supplementary-material-SD1.pdf]

## SUPPLEMENTARY TABLES

Please browse Full Text version to see the data of Supplementary Table 1.

**Supplementary Table 1. Number of SNPs residing in regions common between the original GWAS-based networks. Genes with ‘long-lived’ phenotype are shown in bold.**

**Supplementary Table 2. Selected subnetworks centered around novel nodes with the highest degree in the extended Synthetic and DGRP GWAS-based networks.**

| Novel node | Network   | All other nodes in subnetwork                                                                      | Degree | Total number of genes |
|------------|-----------|----------------------------------------------------------------------------------------------------|--------|-----------------------|
| 1220       | Synthetic | 244, 245, 255, 262, 270, 271, 272, 273, 275, 276, 277, 295, 302, 305, 334, 359, 799, 848, 920, 923 | 20     | 188                   |
| 928        | Synthetic | 11, 233, 234, 238, 265, 343, 360, 361, 366, 370, 409, 456, 536, 531, 545                           | 15     | 290                   |
| 28         | DGRP      | 27, 29, 30, 1063, 1124, 1152, 1179                                                                 | 7      | 114                   |
| 2          | DGRP      | 576, 655, 660, 670, 699, 736, 787, 1120, 1131, 1132, 1152, 1178, 1179, 1183                        | 14     | 255                   |

Please browse Full Text version to see the data of Supplementary Tables 3 and 4.

**Supplementary Table 3. Nodes and interactions comprising each cluster of the extended Synthetic GWAS-based networks.**

**Supplementary Table 4. Nodes and interactions comprising each cluster of the extended DGRP GWAS-based networks.**

**Supplementary Table 5. List of nodes constituting selected clusters in the Synthetic GWAS-based network.**

| Cluster | Nodes in cluster                                                                                           | Total number of  |                  |
|---------|------------------------------------------------------------------------------------------------------------|------------------|------------------|
|         |                                                                                                            | nodes in cluster | genes in cluster |
| 4       | 89, 90, 91, 92, 93, 94, 95, 97, 1319                                                                       | 9                | 92               |
| 5       | 124, 125, 126, 127, 128, 129, 130, 131, 711, 740, 929                                                      | 11               | 229              |
| 11      | 198, 199, 200, 201, 202, 203, 204, 205, 206, 207, 208, 209, 210, 211, 578, 916, 930, 982, 1049, 1431, 1436 | 21               | 249              |
| 23      | 330, 331, 332, 333, 334, 335, 336, 337, 749                                                                | 9                | 141              |
| 29      | 393, 394, 395, 396, 397, 398, 399, 400, 401, 402, 403, 961, 1044, 1338                                     | 14               | 222              |
| 60      | 313, 385, 476, 818, 819, 820, 821, 822, 823, 824, 825, 826, 827, 1218                                      | 14               | 174              |
| 67      | 502, 1078, 1079, 1080, 1081, 1082, 1083, 1084, 1085, 1086, 1386                                            | 11               | 150              |

**Supplementary Table 6. List of nodes constituting selected clusters in the DGRP GWAS-based network.**

| Cluster | Nodes in cluster                                                        | Total number of  |                  |
|---------|-------------------------------------------------------------------------|------------------|------------------|
|         |                                                                         | nodes in cluster | genes in cluster |
| 4       | 53, 54, 55, 56, 57, 58, 59, 60, 61, 1078, 1079, 1338                    | 12               | 125              |
| 18      | 523, 524, 525, 526, 527, 528, 529, 530, 531, 560, 1253                  | 11               | 155              |
| 20      | 105, 478, 521, 572, 573, 574, 575, 576, 577, 578, 579, 580, 581, 1227   | 14               | 256              |
| 26      | 321, 329, 412, 445, 499, 658, 659, 660, 661, 662, 663, 1324, 1367, 1418 | 14               | 223              |
| 28      | 330, 344, 366, 413, 669, 670, 671, 672, 673, 1419                       | 10               | 177              |
| 34      | 318, 776, 777, 778, 779, 780, 781, 782, 783, 784, 785                   | 11               | 103              |
| 40      | 103, 426, 458, 983, 985, 986, 987, 988, 989, 990, 991, 992, 1210, 1336  | 14               | 156              |
| 44      | 361, 429, 448, 1089, 1090, 1091, 1092, 1093, 1094, 1095                 | 10               | 156              |
| 49      | 63, 457, 1147, 1148, 1149, 1150, 1151, 1152, 1153, 1154, 1155           | 11               | 142              |

Please browse Full Text version to see the data of Supplementary Table 7.

**Supplementary Table 7. Genes sharing ‘long-lived’ and ‘short-lived’ phenotypes found in close proximity to mutated and non-mutated TAD border regions.**

**Supplementary Table 8. Top 30 long-range interacting regions for non-coding SNPs from the Synthetic GWAS dataset.**

| Bin number | Non-coding SNP region |                                | Interacting region        |               |                        |
|------------|-----------------------|--------------------------------|---------------------------|---------------|------------------------|
|            | Number of SNPs in bin | Highest recorded SNP's D-value | Strongest interacting bin | Distance (Kb) | Number of genes in bin |
| 2367       | 3                     | 2.727                          | 2362                      | 50            | 2                      |
| 3982       | 7                     | 5.421                          | 3987                      | 50            | 16                     |
| 5470       | 9                     | 5.765                          | 5465                      | 50            | 13                     |
| 2459       | 4                     | 5.170                          | 2463                      | 40            | 6                      |
| 4370       | 12                    | 7.189                          | 4366                      | 40            | 10                     |
| 4560       | 4                     | 3.814                          | 4566                      | 40            | 10                     |
| 5656       | 9                     | 6.284                          | 5660                      | 40            | 16                     |
| 11643      | 2                     | 5.029                          | 11647                     | 40            | 6                      |
| 1605       | 7                     | 7.657                          | 1608                      | 30            | 9                      |
| 2006       | 3                     | 12.009                         | 2003                      | 30            | 7                      |
| 2461       | 1                     | 4.592                          | 2464                      | 30            | 6                      |
| 3146       | 13                    | 3.468                          | 3149                      | 30            | 13                     |
| 3447       | 1                     | 2.160                          | 3444                      | 30            | 10                     |
| 4837       | 8                     | 6.213                          | 4840                      | 30            | 15                     |
| 5702       | 1                     | 3.582                          | 5705                      | 30            | 8                      |
| 6981       | 6                     | 4.577                          | 6978                      | 30            | 4                      |
| 7819       | 4                     | 3.189                          | 7816                      | 30            | 6                      |
| 7883       | 6                     | 5.029                          | 7886                      | 30            | 11                     |
| 7884       | 4                     | 5.989                          | 7887                      | 30            | 12                     |
| 8958       | 11                    | 4.396                          | 8995                      | 30            | 11                     |
| 155        | 14                    | 7.658                          | 153                       | 20            | 6                      |
| 229        | 7                     | 7.550                          | 227                       | 20            | 10                     |
| 324        | 3                     | 5.987                          | 326                       | 20            | 15                     |
| 556        | 11                    | 6.606                          | 554                       | 20            | 10                     |
| 592        | 1                     | 2.066                          | 590                       | 20            | 12                     |
| 945        | 6                     | 4.168                          | 943                       | 20            | 10                     |
| 994        | 5                     | 5.459                          | 996                       | 20            | 3                      |
| 1167       | 10                    | 6.455                          | 1165                      | 20            | 13                     |
| 1173       | 7                     | 6.222                          | 1171                      | 20            | 10                     |
| 1174       | 11                    | 5.694                          | 1176                      | 20            | 9                      |

**Supplementary Table 9. Top 30 long-range interacting regions for non-coding SNPs from the DGRP GWAS dataset.**

| Non-coding SNP region |                   |                             | Interacting region        |               |                |
|-----------------------|-------------------|-----------------------------|---------------------------|---------------|----------------|
| Bin number            | Number of SNPs in | Lowest recorded SNP P-value | Strongest interacting bin | Distance (Kb) | Number of SNPs |
| 2388                  | 8                 | 0.3858                      | 2378                      | 100           | 168            |
| 3644                  | 26                | 0.1303                      | 3637                      | 70            | 190            |
| 2458                  | 34                | 0.06431                     | 2464                      | 60            | 171            |
| 2367                  | 53                | 0.05865                     | 2362                      | 50            | 74             |
| 2957                  | 16                | 0.06397                     | 2962                      | 50            | 228            |
| 3982                  | 256               | 0.007077                    | 3987                      | 50            | 205            |
| 5470                  | 280               | 0.003503                    | 5465                      | 50            | 420            |
| 2457                  | 28                | 0.08089                     | 2453                      | 40            | 81             |
| 2459                  | 73                | 0.5731                      | 2463                      | 40            | 120            |
| 4370                  | 297               | 0.008632                    | 4366                      | 40            | 192            |
| 4560                  | 88                | 0.02264                     | 4566                      | 40            | 280            |
| 5656                  | 222               | 0.002052                    | 5660                      | 40            | 307            |
| 11643                 | 51                | 0.05711                     | 11647                     | 40            | 138            |
| 1605                  | 95                | 0.0236                      | 1608                      | 30            | 230            |
| 2006                  | 64                | 0.01037                     | 2003                      | 30            | 153            |
| 2124                  | 14                | 0.0354                      | 2121                      | 30            | 22             |
| 2283                  | 17                | 0.1617                      | 2286                      | 30            | 62             |
| 2372                  | 68                | 0.01846                     | 2375                      | 30            | 128            |
| 2456                  | 44                | 0.01432                     | 2453                      | 30            | 81             |
| 2461                  | 32                | 0.04341                     | 2464                      | 30            | 171            |
| 3146                  | 377               | 0.006937                    | 3149                      | 30            | 295            |
| 3447                  | 44                | 0.13                        | 3444                      | 30            | 285            |
| 4837                  | 181               | 0.007141                    | 4840                      | 30            | 359            |
| 5702                  | 27                | 0.01703                     | 5705                      | 30            | 322            |
| 6981                  | 87                | 0.00301                     | 6978                      | 30            | 83             |
| 7639                  | 11                | 0.09939                     | 7636                      | 30            | 126            |
| 7819                  | 238               | 0.001871                    | 7816                      | 30            | 203            |
| 7883                  | 108               | 0.007967                    | 7886                      | 30            | 234            |
| 7884                  | 120               | 0.006706                    | 7887                      | 30            | 255            |
| 8958                  | 222               | 0.001062                    | 8955                      | 30            | 197            |

Please browse Full Text version to see the data of Supplementary Table 10.

**Supplementary Table 10. Chromosome, start and end positions for each 80 Kb bin.**
